# Supplementary material for: 1-D hydrogen-bonded organization of hexanuclear {3d-4f-5d} complexes: evidence for slow relaxation of the magnetization for [{LMe2Ni(H2O)Ln(H2O)4.5}2{W(CN)8}2] with Ln = Tb and Dy
Source: Royal Society of Chemistry journal article supplement (doi:10.1039/b906539c), 2009-01-01

*SUPPORTING INFORMATION*

**1-D hydrogen-bonded organization of hexanuclear {3d-4f-5d} complexes:  
Evidence for slow relaxation of the magnetization for  
[ $\{L^{Me2}Ni(H_2O)Ln(H_2O)_{4.5}\}_2\{W(CN)_8\}_2$ ] with Ln = Tb and Dy**

Sébastien Dhers,<sup>a,b</sup> Shaon Sahoo,<sup>c,d</sup> Jean-Pierre Costes,<sup>a,b</sup> Carine Duhayon,<sup>a,b</sup> S. Ramasesha,<sup>c,\*</sup>  
Jean-Pascal Sutter,<sup>a,b,\*</sup>

**Table S1.** Results of the SHAPE analysis for the  $\{W(CN)_8\}$  cores in compounds **2**.

**Figure S1.** Frequency dependence of the imaginary component,  $\chi_M''$ , of the ac-susceptibility for [ $\{L^{Me2}Ni(H_2O)Tb(H_2O)_{4.5}\}_2\{W(CN)_8\}_2$ ] **2** measured in  $H_{ac} = 3$  Oe in the absence of static field.

**Figure S2.** Field dependence of the imaginary component,  $\chi_M''$ , of the ac-susceptibility for [ $\{L^{Me2}Ni(H_2O)Tb(H_2O)_{4.5}\}_2\{W(CN)_8\}_2$ ] **2** measured in  $H_{ac} = 3$  Oe with frequency 100 Hz.

**SUPPORTING INFORMATION**

**Table S1.** Results of the SHAPE<sup>1</sup> analysis for the {W(CN)<sub>8</sub>} cores in compounds **2**.

| [M(CN) <sub>8</sub> ] | (SAPR-8) <sup>a</sup> | (DD-8) <sup>a</sup> | (JBTP-8) <sup>a</sup> | (SBTP-8) <sup>a</sup> |
|-----------------------|-----------------------|---------------------|-----------------------|-----------------------|
| W1                    | <b>0.81413</b>        | 1.12031             | 1.76658               | 24.92672              |
| W2                    | <b>0.13741</b>        | 2.49157             | 2.86591               | 24.30476              |

<sup>a</sup> SAPR-8: *D4d*, Square antiprism; DD-8: *D2d*, Triangular dodecahedron; JBTP-8: *C2*, Biaugmented trigonal prism J50; SBTP-8: *C2v*, Spherical biaugmented trigonal prism.

<sup>1</sup> Llunell, M.; Casanova, D.; Cirera, J.; Bofill, J. M.; Alemany, P.; Alvarez, S.; Pinsky, M.; Avnir, D. *SHAPE: Continuous shape measures of polygonal and polyhedral molecular fragments*, 1.1b; University of Barcelona: Barcelona, 2005. Casanova, D.; Llunell, M.; Alemany, P.; Alvarez, S., *Chem. Eur. J.* **2005**, *11*, 1479-94.

**SUPPORTING INFORMATION**

**Figure S1.** Frequency dependence of the imaginary component,  $\chi_M''$ , of the ac-susceptibility for  $[\{L^{\text{Me}2}\text{Ni}(\text{H}_2\text{O})\text{Tb}(\text{H}_2\text{O})_{4.5}\}_2\{\text{W}(\text{CN})_8\}_2]$  **2** measured in  $H_{\text{ac}} = 3$  Oe in the absence of static field.

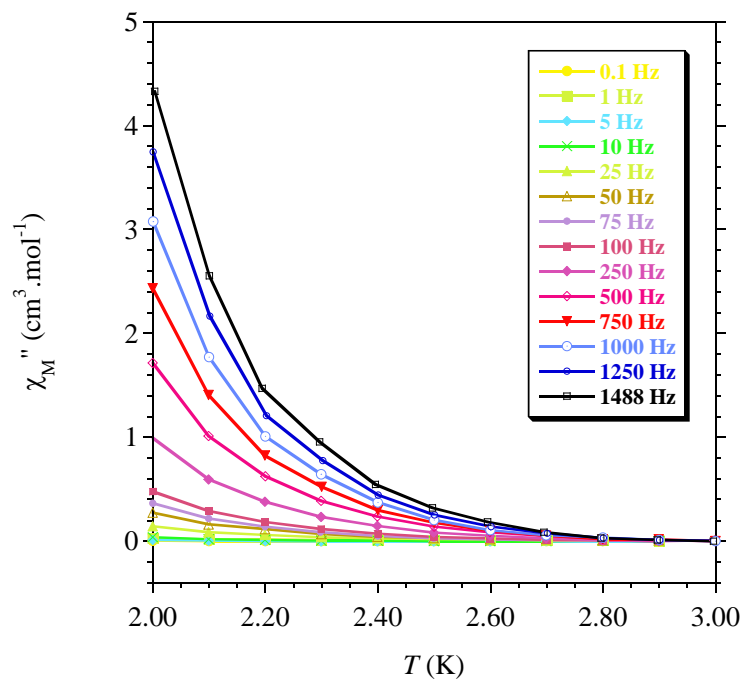

**SUPPORTING INFORMATION**

**Figure S2.** Field dependence of the imaginary component,  $\chi_M''$ , of the ac-susceptibility for  $[\{L^{Me_2}Ni(H_2O)Tb(H_2O)_{4.5}\}_2\{W(CN)_8\}_2] \mathbf{2}$  measured in  $H_{ac} = 3$  Oe with frequency 100 Hz.

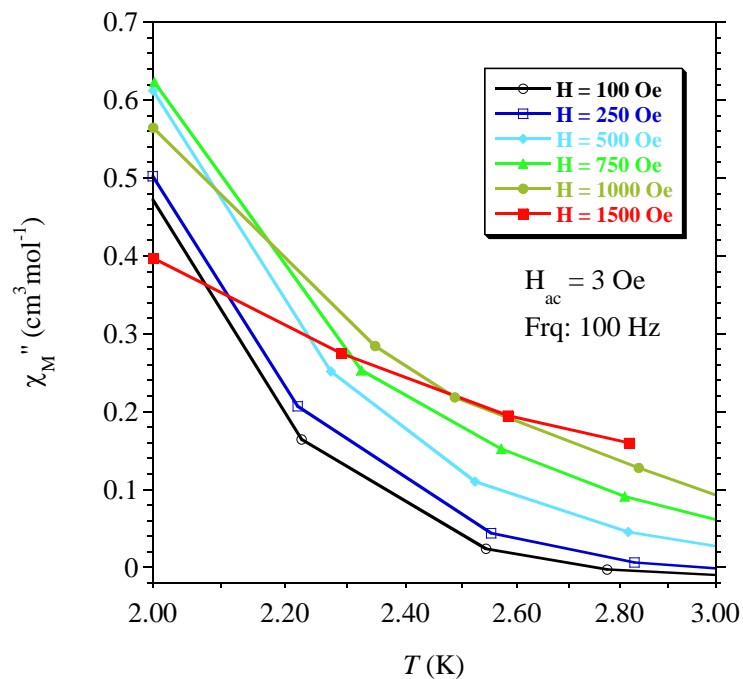

Supplement: b906539c.pdf [file b906539c.pdf]
